# Supplementary material for: Enhanced oxidase-mimicking activity of Ce4+ by complexing with nucleotides and its tunable activity for colorimetric detection of Fe2+
Source: Royal Society of Chemistry journal article supplement (doi:10.1039/d1cc02675e), 2021-01-01
Supplement: d1cc02675e1.pdf [file d1cc02675e1.pdf]

## Electronic Supplementary Information for

### **Enhanced oxidase-mimicking activity of Ce<sup>4+</sup> by complexing with nucleotides and its tunable activity for colorimetric detection of Fe<sup>2+</sup>**

Jiaojiao Liu, Ying Cao, Xinyue Zhu, Lina Zou, Gaiping Li\* and Baoxian Ye

College of Chemistry, Zhengzhou University, Zhengzhou, 450001, PR China.

#### **Experimental**

##### **Materials and reagents**

Adenosine-5'-monophosphate (AMP), reduced glutathione (GSH) and L-Ascorbic acid (AA) were obtained from Sangon Biotech Co., Ltd. (Shanghai, China). 3,3',5,5'-tetramethylbenzidine (TMB), N-2-hydroxyethylpiperazine-N'-ethanesulfonic acid (HEPES), ammonium ceric nitrate (Ce(NH<sub>4</sub>)<sub>2</sub>(NO<sub>3</sub>)<sub>6</sub>), ferrous sulfate heptahydrate (Fe<sub>2</sub>SO<sub>4</sub>·7H<sub>2</sub>O), acetic acid (HAc), sodium acetate (NaAc), cysteine (Cys) and other metal salts were purchased from Aladin Co., Ltd. (Shanghai, China). All the reagents were used directly without any purification. Solutions were made from ultrapure water with a conductivity of 18.2 MΩ cm<sup>-1</sup> (Thermo Fisher Scientific Co. Ltd., Shanghai, China). HEPES buffer (0.1 M, pH 7.4) and HAc-NaAc buffer (0.2 M, pH 4.0) was used through this study.

##### **Instruments**

Scanning electron microscopy (SEM, Sigma 500, Gemini, Japan) was used to characterized the morphologies. UV-vis absorption spectra were collected with Lambda 35 UV-vis spectrometer (Pgeneral Instrument, Beijing, China) using silica cuvette (3.0 mL, 1 cm light path). X-ray photoelectron spectroscopy (XPS) characterizations were measured by AXIS Ultra DLD electron spectrometer (Kratos). Fourier transform infrared (FT-IR) spectra were obtained using NEXUS 470 FT-IR

spectrometer.

### **Preparation of AMP-Ce<sup>4+</sup> ICPs**

AMP-Ce<sup>4+</sup> ICPs were synthesized according to the previous report.<sup>1</sup> In brief, Ce(NH<sub>4</sub>)<sub>2</sub>(NO<sub>3</sub>)<sub>6</sub> aqueous solution (10 mM, 4.5 mL) was mixed with HEPES buffer (0.1 M, 4.5 mL, pH, 7.4) containing AMP (10 mM), and then the mixture was stirred at room temperature for 30 min to obtain a turbid suspension. The product was obtained by centrifugation (10000 rpm, 10 min) and purified by washing for three times with ultrapure water. Finally, the purified product was re-dispersed into HEPES buffer (0.1 M, 9 mL, pH, 7.4) to form AMP-Ce<sup>4+</sup> ICPs suspension and stored at 4 °C for use.

### **Oxidase mimicking activity of AMP-Ce<sup>4+</sup> ICPs**

The oxidase mimicking activity of AMP-Ce<sup>4+</sup> ICPs was investigated by the blue color reaction of catalyzing TMB oxidation without H<sub>2</sub>O<sub>2</sub>. Briefly, AMP-Ce<sup>4+</sup> ICPs stock solution (5 mM, 30 μL) and TMB solution (5 mM, 20 μL, dissolved in ethanol) were added into HAc-NaAc buffer (0.2 M, 450 μL, pH 4.0). The mixture was incubated under the room temperature, and the time-dependent UV-vis spectra were measured accordingly.

### **Colorimetric detection of Fe<sup>2+</sup>**

Fe<sup>2+</sup> detection was performed as follows: firstly, 30 μL of AMP-Ce<sup>4+</sup> ICPs stock solution and 100 mM of Fe<sup>2+</sup> with various volume were incubated at room temperature for 10 min; secondly, 20 μL of 5 mM TMB solution and HAc-NaAc buffer (0.2 M, pH 4.0) were added into the above solution to bring the final total volume to 500 μL; finally, the UV-vis spectra of each reaction solution were measured after 15 min.

For Fe<sup>2+</sup> determination in tap water, different volumes of Fe<sup>2+</sup> stock solution (10 mM) was diluted with tap water for the measurement. The detection procedure was

same to the above description.

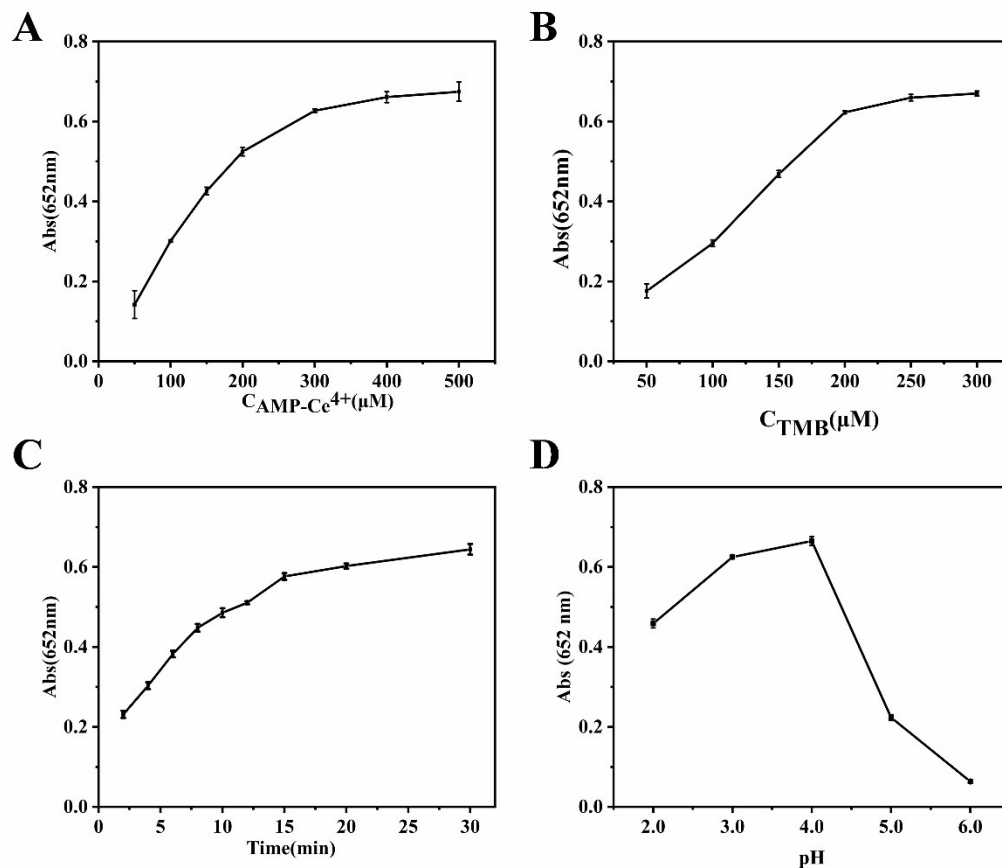

Fig. S1. Dependency of the relative activity of AMP- $Ce^{4+}$  ICPs on (A) concentration of AMP- $Ce^{4+}$  ICPs, (B) concentration of TMB, (C) reaction time and (D) buffer pH.

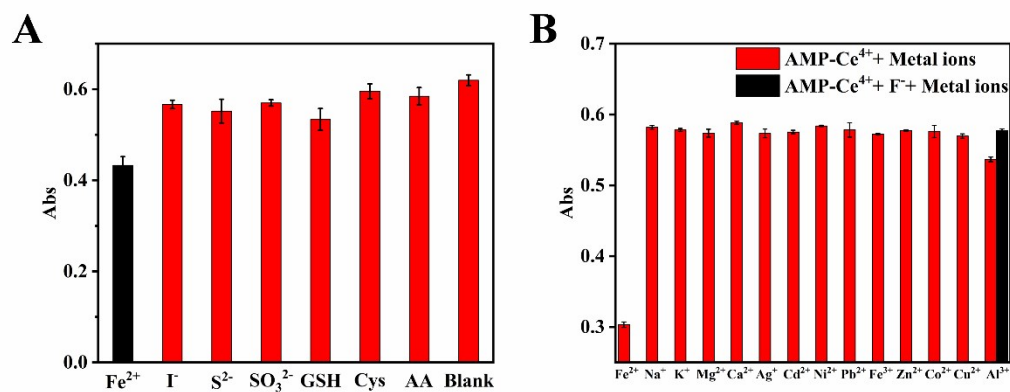

Fig. S2. (A) Selectivity of this colorimetric sensor for  $Fe^{2+}$  detection against common

reductive substance. The concentration of these substance is 10  $\mu\text{M}$ . (B) Selectivity of this colorimetric sensor for  $\text{Fe}^{2+}$  detection against common metal ions. Except the concentration of  $\text{Fe}^{2+}$  is 20  $\mu\text{M}$ , the concentration of other interfering ions is 200  $\mu\text{M}$ . The concentration of  $\text{F}^-$  is 600  $\mu\text{M}$ .

Table S1 Comparison of apparent kinetic parameters of AMP- $\text{Ce}^{4+}$  and  $\text{Ce}^{4+}$  toward TMB.

| Oxidase mimics             | $K_m$ (mM) | $V_{\max}$ ( $10^{-8} \text{ Ms}^{-1}$ ) |
|----------------------------|------------|------------------------------------------|
| AMP- $\text{Ce}^{4+}$ ICPs | 0.090      | 14.8                                     |
| $\text{Ce}^{4+}$           | 0.345      | 12.96                                    |

Table S2. XPS data of AMP- $\text{Ce}^{4+}$  before and after addition of  $\text{Fe}^{2+}$ .

| Samples               | Binding energy (eV)    |                  | Relative proportion |                  |
|-----------------------|------------------------|------------------|---------------------|------------------|
|                       | $\text{Ce}^{4+}$       | $\text{Ce}^{3+}$ | $\text{Ce}^{4+}$    | $\text{Ce}^{3+}$ |
| AMP- $\text{Ce}^{4+}$ | 882.44, 888.10, 898.25 | 885.54           | 94.94%              | 5.06%            |
|                       | 901.41, 907.87, 916.81 | 904.16           |                     |                  |

|                                              |                        |        |        |        |
|----------------------------------------------|------------------------|--------|--------|--------|
| <b>AMP-Ce<sup>4+</sup> + Fe<sup>2+</sup></b> | 882.22, 888.44, 898.04 | 885.69 | 73.73% | 26.27% |
|                                              | 901.22, 907.84, 916.50 | 903.88 |        |        |

Table S3. Comparison with the performance of the AMP-Ce<sup>4+</sup> sensor with the referenced methods for colorimetric detection of Fe<sup>2+</sup>.

| Material                                                                   | Linear range (μM) | LOD (μM) | Ref.      |
|----------------------------------------------------------------------------|-------------------|----------|-----------|
| HPHN                                                                       | 1-18              | 0.77     | 2         |
| EAR-AuNPs                                                                  | 10-500            | 1.5      | 3         |
| Phenylene-acetylene                                                        | 0-6               | 0.02     | 4         |
| Carbon nanotubes                                                           | 1-100             | 0.22     | 5         |
| MoS <sub>2</sub> /H <sub>2</sub> O <sub>2</sub> /OPD                       | 0.01-0.8          | 0.007    | 6         |
| 2,6-bis((2-(((pyridine-2-yl)methylamino)methyl)phenol)ethylamido)pyridine) | 0-60              | 2.94     | 7         |
| Electrospun nanofiber                                                      | 1.76-62.5         | 1.82     | 8         |
| AMP-Ce <sup>4+</sup>                                                       | 1-25              | 0.089    | This work |

Table S4. Recovery test results of Fe<sup>2+</sup> in tap water samples

| Sample | Fe <sup>2+</sup> added<br>(μM) | Fe <sup>2+</sup> founded<br>(μM) | Recovery<br>(%) | RSD<br>(%) |
|--------|--------------------------------|----------------------------------|-----------------|------------|
| 1      | 2                              | 1.95                             | 97.5            | 2.2        |
| 2      | 10                             | 9.56                             | 95.6            | 3.0        |
| 3      | 20                             | 20.63                            | 103.2           | 2.2        |

## References

1. Z. Zhang, Y. Wu, S. He, Y. Xu, G. Li and B. Ye, *Anal. Chim. Acta*, 2018, **1014**,85-90.
2. M. Yang, S. C. Lee, M. Kim, M. H. Lim and C. Kim, *Spectrochim. Acta A Mol. Biomol. Spectrosc.*, 2021, **245**, 118899.
3. X. Chen, J. Ji, G. Shi, Z. Xue, X. Zhou, L. Zhao and S. Feng, *RSC Adv.*, 2020, **10**, 32897-32905.
4. Y. Zhang, X. Chen, X. Liu, M. Wang, J. Liu, G. Gao, X. Zhang, R. Sun, S. Hou and H. Wang, *Sens. Actuators B Chem.*, 2018, **273**, 1077-1084.
5. C. Wang, Q. Wang and R. Tan, *Analyst*, 2018, 143, 4118-4127.
6. Y. Wang, J. Hu, Q. Zhuang and Y. Ni, *Biosens. Bioelectron.*, 2016, **80**, 111-117.
7. H. Kim, Y. J. Na, E. J. Song, K. B. Kim, J. M. Bae and C. Kim, *RSC Adv.*, 2014, **4**, 22463-22469.
8. D. A. Ondigo, Z. R. Tshentu and N. Torto, *Anal. Chim. Acta*, 2013, **804**, 228-234.
